# Supplementary material for: Isoform Diversity and Regulation in Peripheral and Central Neurons Revealed through RNA-Seq
Source: PLoS One. 2012 Jan 17;7(1):e30417. doi: 10.1371/journal.pone.0030417 (PMC3260295; doi:10.1371/journal.pone.0030417)
Supplement: Table S2 — Transcription factor names and Z-scores that went into creating the Figure 4 heatmap. The transcription factors are from the JASPAR database (release 10/2009). The Z-score for each TFBS in the promoters of DRG or CGN enriched isoforms is shown. (XLSX) [file pone.0030417.s004.xlsx]

## Sheet: Supplemental Table 2
Position	Transcripion Factor	DRG (CGN)	CGN (DRG)
1	Pax6	2.93324	-0.666302
2	NKX3-1	1.97613	-0.538191
3	RORA_1	1.51992	-0.900991
4	T	1.31877	-0.970044
5	Pax4	1.50551	-1.1955
6	Foxa2	1.41048	-1.4852
7	Broad-complex_1	3.58221	-2.03377
8	FOXF2	2.61739	-1.72356
9	Evi1	3.52409	-2.52644
10	NFIL3	3.38478	-2.72242
11	Foxq1	3.35406	-3.12532
12	Lhx3	4.1849	-0.395569
13	PBX1	4.03585	-0.875507
14	PPARG-RXRA	4.8923	-0.393465
15	Athb-1	3.69531	0.0851704
16	NR1H2-RXRA	4.5864	-1.31398
17	SRF	4.25212	-1.80721
18	Ar	2.3326	0.362425
19	IRF2	2.16666	0.938195
20	PPARG	2.40137	2.14913
21	CF2-II	1.5179	1.73186
22	Su(H)	1.06803	1.63428
23	NFYA	0.888262	0.800575
24	TLX1-NFIC	-1.09984	-0.492968
25	Cebpa	-1.39039	-0.514808
26	EMBP1	-0.80107	-0.378023
27	SP1	-1.4706	-0.0139271
28	Prrx2	-1.65764	-0.907499
29	SOX9	-1.5	-1.5
30	AGL3	-1.5	-1.5
31	REST	-1.55295	-1.80207
32	RXRA-VDR	-1.26619	-1.98286
33	RELA	-1.29794	-2.0238
34	MYB.ph3	0.512762	-1.44235
35	SQUA	0.293076	-1.22269
36	IRF1	0.0842344	-1.51594
37	FOXI1	-0.0637591	-1.60526
38	HLF	0.130132	-1.70246
39	Sox17	-0.5	-1.5
40	REL	-0.5	-1.5
41	TBP	-0.478869	-1.44235
42	GABPA	-0.279154	-1.96695
43	NR2F1	0.442606	-2.10983
44	PEND	0.296344	-2.33484
45	Sox5	-0.00165731	-2.46953
46	FOXL1	-0.539828	-0.693319
47	dl_1	-0.747494	-0.90249
48	TAL1-TCF3	-0.5	-1.07813
49	NHLH1	-0.139853	-0.378023
50	hb	0.55859	-0.870931
51	TP53	0.394468	-0.576012
52	MAX	0.020771	-0.89181
53	ATHB5	0.901001	0.218743
54	NF-kappaB	0.684158	0.144117
55	ELK4	0.627033	-0.26988
56	Foxd3	1.06072	-0.624073
57	Dl_2	0.982335	-0.577095
58	STAT1	1.15223	-0.546816
59	Nobox	1.05401	-0.325842
60	Pdx1	-0.21406	0.329299
61	Broad-complex_2	-0.405654	0.0929149
62	Arnt	-0.80107	0.574262
63	Staf	-0.367885	1.28643
64	MEF2A	2.19613	-4.28881
65	Broad-complex_3	1.29748	-4.38829
66	FOXD1	1.59025	-2.13435
67	Broad-complex_4	1.56366	-2.48276
68	HMG-IY	1.46573	-2.98454
69	RORA_2	4.35175	-4.20661
70	HNF1A	4.30073	-3.41427
71	bZIP911	-2.26061	-2.95277
72	MIZF	-2.4799	-2.91789
73	Ubx	-2.7929	-2.53491
74	HNF4A	-2.47057	-3.93499
75	Spz1	-0.487306	-3.93499
76	Ddit3-Cebpa	-0.487306	-3.93499
77	Eip74EF	-0.487306	-3.93499
78	TEAD	-0.343409	-3.75717
79	MYC-MAX	-0.840713	-3.36529
80	E2F1	-1.34476	-4.12098
81	NR3C1	-1.38267	-4.02843
82	RUNX1	-2.7893	-0.693319
83	ESR1	-3.21273	-0.868489
84	id1	-2.47057	-1.07813
85	Pax5	-3.19085	-1.81422
86	SRY	-3.70645	-2.89334
87	RREB1	-4.1703	-2.20486
88	usp	-5.29943	-3.5762
89	NFKB1	-5.51755	-4.42244
Table S2. Transcription factor names and Z-scores that went into creating the Figure 4 heatmap.
