# Supplementary material for: Isoform Diversity and Regulation in Peripheral and Central Neurons Revealed through RNA-Seq
Source: PLoS One. 2012 Jan 17;7(1):e30417. doi: 10.1371/journal.pone.0030417 (PMC3260295; doi:10.1371/journal.pone.0030417)
Supplement: Table S3 — MiRNA names and Z-scores that went into creating the Figure 5 heatmap. The Z-score for each TFBS in the 3′ UTRs of DRG or CGN enriched isoforms is shown. (XLSX) [file pone.0030417.s005.xlsx]

## Sheet: Supplemental Table 3
Position	miRNA	DRG (CGN)	CGN (DRG)
1	miR-138	-5.90031	6.3479
2	miR-762	-4.79353	6.28848
3	miR-705	-3.16227	5.65516
4	miR-683	-4.76717	3.93241
5	miR-744	-4.19234	4.73254
6	miR-491/491-5p	0.747031	8.70066
7	miR-342-5p	0.273037	7.94557
8	miR-298.mr	1.32473	6.86088
9	miR-709/1827	3.0596	6.37947
10	miR-24	-3.29011	2.03259
11	miR-689	-3.18148	2.77138
12	miR-34a/34b-5p/34c/34c-5p/449/449abc/699	-2.34376	2.19541
13	miR-770-3p	-2.37804	1.93747
14	miR-423/423-3p	-2.47492	1.89076
15	miR-412.m	-2.10605	1.60244
16	miR-666-3p	-2.15191	1.73492
17	miR-324-5p	-2.13655	1.22164
18	miR-340-3p	-1.94067	1.22044
19	miR-22	-2.4748	3.26511
20	miR-883a-5p	-2.51501	2.78733
21	miR-763/1207-3p	-1.69351	2.63071
22	miR-339-3p	-1.43737	3.03661
23	miR-125b-3p	-1.389	3.0707
24	miR-1188	-1.65774	3.222
25	miR-485/485-5p	-1.69382	3.03983
26	miR-546	-1.81162	3.15715
27	miR-453.m	-1.09329	2.94829
28	miR-344-5p/484	-1.07085	2.62789
29	miR-346	-0.676506	2.71381
30	miR-487/487b	-0.771491	3.10047
31	miR-696	-0.439826	2.9486
32	miR-676.m	-0.528823	3.06211
33	miR-370	-1.78647	3.67058
34	miR-210	-0.970155	3.56846
35	miR-323-5p	-0.461233	5.19004
36	miR-423a/423-5p	-0.670704	5.75838
37	miR-331/331-3p	-0.747202	4.39418
38	miR-673-3p	-1.08014	4.28627
39	miR-711	-0.227951	3.96487
40	miR-296-5p	0.081491	4.12424
41	miR-675/675-5p	0.142669	4.25536
42	miR-343.m	0.528296	4.23914
43	miR-466hj	0.859781	4.39498
44	miR-720.m	0.94013	3.94253
45	miR-125/351	0.833044	3.6239
46	miR-1190	1.09325	3.50789
47	miR-764-3p	1.07162	3.48955
48	miR-666-5p	0.525667	3.29336
49	miR-681	0.18407	2.82236
50	miR-150	0.089718	3.31428
51	miR-741	0.0185023	3.141
52	miR-532-3p	1.50627	3.67627
53	miR-223	1.42502	3.25821
54	miR-665	1.62634	3.24154
55	miR-220	0.7337	2.70554
56	miR-202/202-3p	0.572101	2.83505
57	miR-574-5p	1.00083	2.8286
58	miR-450a-3p.m	1.32035	2.60555
59	miR-433	-2.54827	-2.62097
60	miR-486/486-5p	-2.97296	-2.39456
61	miR-362-5p	-2.78691	-2.43535
62	miR-23ab	-1.73258	-2.74019
63	miR-678	-1.72913	-2.82072
64	miR-135	-1.47107	-2.69809
65	miR-509-3p.m	-1.59706	-2.66484
66	miR-434/434-3p	-2.03409	-2.89353
67	miR-875-5p	-1.9386	-2.57974
68	miR-539	-3.31685	-4.15749
69	miR-501/501-5p	-1.90049	-3.94455
70	miR-208/208ab	-2.36568	-3.98531
71	miR-694	-1.40629	-4.44999
72	miR-467b	-1.134	-3.60735
73	miR-409-3p	-1.38187	-3.85931
74	miR-361/361-5p	-1.44414	-3.73629
75	miR-467eh	-1.45537	-3.62904
76	miR-669a	-2.16807	0.29701
77	miR-469	-2.14289	0.247889
78	miR-129-3p	-2.48935	0.918425
79	miR-615-3p	-2.55428	0.698029
80	miR-122	-2.78286	0.681891
81	miR-137	-2.20196	-0.181916
82	miR-770/770-5p	-1.98882	-0.515378
83	miR-139	-2.26691	-0.488622
84	miR-669g	-2.6813	-0.434427
85	miR-876-5p	-2.6687	0.0023976
86	miR-581/669d	-2.67109	-0.152931
87	miR-191	-2.26143	-1.6376
88	miR-675-3p	-2.03639	-1.62555
89	miR-126/126-3p	-1.96652	-1.59584
90	miR-692	-2.1521	-1.49361
91	miR-488	-2.09608	-1.36877
92	miR-877	-2.17121	-0.93749
93	miR-684	-2.65171	-1.16552
94	miR-297/297a/297b-5p/297c	-2.37723	-1.24942
95	miR-199/199-5p	-3.39296	-0.951586
96	miR-669e	-2.77487	-1.65486
97	miR-652	-3.1152	-1.49519
98	miR-326/330/330-5p	-5.50214	1.48824
99	miR-29abc	-4.37516	1.1869
100	miR-188-3p	-5.39052	-2.38275
101	miR-431	-4.24997	-1.57736
102	miR-590/590-3p	2.51693	-7.46227
103	miR-369/369-3p	0.847501	-2.5937
104	miR-200bc/429	0.541585	-2.71681
105	miR-376c	0.647571	-2.88001
106	miR-421	1.43514	-3.19944
107	miR-142-5p	1.27153	-3.03239
108	miR-34b-3p/34c-3p	1.16779	-3.16114
109	miR-574/574-3p	1.11303	-2.8661
110	miR-743ab/743b-3p	1.19617	-2.61942
111	miR-704	1.23213	-2.61404
112	miR-878/878-3p	2.66632	-3.78021
113	miR-543	3.03341	-3.03117
114	miR-291a-5p/291b-5p	2.7001	-3.08835
115	miR-495/1192	2.61415	-3.17808
116	miR-19	1.97295	-2.31349
117	miR-742	1.9563	-2.44989
118	miR-154	1.88204	-2.768
119	miR-132/212	2.1085	-2.80416
120	miR-290-5p/292-5p/371-5p	2.34846	-1.924
121	miR-871	3.00214	-2.41122
122	miR-130/301	3.03419	-1.87199
123	miR-410	1.60513	-5.62244
124	miR-494	1.44342	-3.97307
125	miR-340/340-5p	1.73642	-3.79915
126	miR-568	1.88533	-3.9105
127	miR-374/374ab	1.19345	-4.5007
128	miR-323/323-3p	0.710702	-4.54279
129	miR-465a-5p/465b-5p/465c-5p	0.898703	-4.46504
130	miR-297b-3p/466a-3p/466b-3-3p/466c-3p/466d-3p/466e-3p/467g	-0.292502	-5.12226
131	miR-350	-0.0654453	-3.9618
132	miR-1-2-as	-0.0756724	-4.6108
133	miR-547	-0.229732	-4.40438
134	miR-499/499-5p	-1.06561	-3.20075
135	miR-331-5p	-0.846868	-3.28474
136	miR-380-3p	-0.577049	-3.80181
137	miR-466g	-0.748566	-3.59163
138	miR-335-3p	0.313512	-3.4581
139	miR-693-3p	0.542848	-3.46768
140	miR-880	-0.329547	-2.91819
141	miR-148/152	0.252471	-3.1029
142	miR-377	0.192265	-2.81735
143	miR-9	5.46131	-1.2348
144	miR-186	3.93168	-2.04317
145	miR-338/338-3p	4.48816	-1.37054
146	miR-466l	6.7969	-3.17189
147	miR-126/126-5p	4.72118	-4.40044
148	miR-325/325-3p	5.60065	-4.13772
149	miR-1196	4.848	-3.27856
150	miR-124/506	3.93427	-3.41538
151	miR-680	5.55228	1.97859
152	miR-182	4.11708	2.52725
153	miR-214/761	4.1488	2.24292
154	miR-25/32/92/92ab/363/367	2.1387	-0.371585
155	miR-873	1.93442	-0.574429
156	miR-669f	2.27651	-1.07144
157	miR-190	2.72336	-1.12144
158	miR-143	2.24057	0.47248
159	miR-383	2.36176	0.824967
160	miR-15/16/195/424/497	2.43461	0.00641111
161	miR-369-5p	2.46039	0.185226
162	miR-717	2.05824	0.263979
163	miR-686	2.06845	0.10762
164	miR-134	2.20452	0.131691
165	miR-411	3.48458	-0.646902
166	miR-685	3.26505	0.599522
167	miR-669h-3p/669k	3.47841	0.168344
168	miR-466f-3p	3.53385	-0.0645648
169	miR-7/7ab	3.35378	-0.158457
170	miR-759	1.97039	1.13056
171	miR-496	2.0784	1.32119
172	miR-669c	2.40648	1.68406
173	miR-28/28-5p/708	2.54597	2.11136
174	miR-455/455-3p	2.33219	2.01474
175	miR-341	2.25444	2.03214
176	miR-465a-3p/465b-3p/465c-3p	4.16485	1.2827
177	miR-147/147b	3.09267	1.42531
178	miR-1193	3.06409	0.919674
179	miR-345/345-3p	3.3837	1.10009
Table S3. MiRNA names and Z-scores that went into creating the Figure 5 heatmap.
